# Supplementary material for: Validation of the Reference Genes for Expression Analysis in the Hippocampus after Transient Ischemia/Reperfusion Injury in Gerbil Brain
Source: MDPI journal article supplement (doi:10.3390/ijms24032756), 2023-02-01
Supplement: s1 [file s1]

**Table S1.** Mean Ct values and standard deviation (SD) of candidate reference genes in the CA1 and CA2-3, DG areas of the hippocampus at several time points after 5 min of ischemia. Data are expressed as mean  $\pm$  SD, n = 30.

| Gene           | mean Ct | SD   |
|----------------|---------|------|
| <i>Gapdh</i>   | 21.42   | 0.77 |
| <i>Actb</i>    | 21.49   | 0.84 |
| <i>18SrRNA</i> | 12.28   | 1.16 |
| <i>Hprt1</i>   | 26.36   | 0.7  |
| <i>Hmbs</i>    | 30.23   | 0.59 |
| <i>Ywhaz</i>   | 23.21   | 0.85 |
| <i>Bud23</i>   | 29.03   | 0.69 |

**Table S2.** Stability value of candidate reference genes from RefFinder and each algorithm from the CA1 and CA2-3,DG regions of the hippocampus, separately. SV and R stand for stability value and rank for each method, respectively.

| Region of hippocampus | Gene name      | RefFinder |   | Delta Ct |   | BestKeeper |   | NormFinder |   | geNorm |   |
|-----------------------|----------------|-----------|---|----------|---|------------|---|------------|---|--------|---|
|                       |                | SV        | R | SV       | R | SV         | R | SV         | R | SV     | R |
| CA1                   | <i>Gapdh</i>   | 1.861     | 2 | 0.519    | 1 | 0.562      | 4 | 0.177      | 1 | 0.31   | 3 |
|                       | <i>Actb</i>    | 2.06      | 3 | 0.548    | 3 | 0.436      | 2 | 0.325      | 3 | 0.276  | 1 |
|                       | <i>18SrRNA</i> | 7.00      | 7 | 1.048    | 7 | 1.102      | 7 | 0.981      | 7 | 0.658  | 7 |
|                       | <i>Hprt1</i>   | 5.733     | 6 | 0.747    | 6 | 0.576      | 5 | 0.595      | 6 | 0.501  | 6 |
|                       | <i>Hmbs</i>    | 1.414     | 1 | 0.538    | 2 | 0.383      | 1 | 0.271      | 2 | 0.276  | 1 |
|                       | <i>Ywhaz</i>   | 4.949     | 5 | 0.612    | 5 | 0.673      | 6 | 0.35       | 4 | 0.417  | 5 |
|                       | <i>Bud23</i>   | 3.936     | 4 | 0.591    | 4 | 0.56       | 3 | 0.389      | 5 | 0.326  | 4 |
| CA2-3,DG              | <i>Gapdh</i>   | 3.936     | 5 | 0.58     | 4 | 0.556      | 5 | 0.346      | 4 | 0.417  | 3 |
|                       | <i>Actb</i>    | 6.735     | 7 | 0.834    | 7 | 0.671      | 6 | 0.74       | 7 | 0.643  | 7 |
|                       | <i>18SrRNA</i> | 6.236     | 6 | 0.806    | 6 | 0.824      | 7 | 0.699      | 6 | 0.567  | 6 |
|                       | <i>Hprt1</i>   | 1.189     | 1 | 0.543    | 1 | 0.416      | 1 | 0.278      | 2 | 0.348  | 1 |

|              |       |   |       |   |       |   |       |   |       |   |
|--------------|-------|---|-------|---|-------|---|-------|---|-------|---|
| <i>Hmbs</i>  | 2.213 | 2 | 0.546 | 2 | 0.521 | 3 | 0.241 | 1 | 0.446 | 4 |
| <i>Ywhaz</i> | 2.659 | 3 | 0.62  | 5 | 0.503 | 2 | 0.444 | 5 | 0.348 | 1 |
| <i>Bud23</i> | 3.663 | 4 | 0.574 | 3 | 0.536 | 4 | 0.31  | 3 | 0.473 | 5 |
